# Supplementary material for: How Many Chemicals in Commerce Have Been Analyzed in Environmental Media? A 50 Year Bibliometric Analysis
Source: PubMed Central journal article supplement (PMC10308830; doi:10.1021/acs.est.2c09353), 2023-06-15
Supplement: es2c09353_si_001.pdf [file es2c09353_si_001.pdf]

## Supporting information

### How Many Chemicals in Commerce Have Been Analysed in Environmental Media?

#### A 50 year Bibliometric Analysis

Derek C.G. Muir<sup>1,2\*</sup>, Gordon J. Getzinger<sup>3,4</sup>, Matt McBride<sup>5</sup>, P. Lee Ferguson<sup>4</sup>

<sup>1</sup>Environment & Climate Change Canada, Burlington, ON L7S1A1 Canada

<sup>2</sup>School of Environmental Sciences, University of Guelph, Guelph ON N1G2W1 Canada

<sup>3</sup>School of Environmental Sustainability, Loyal University Chicago, Chicago IL 60660 USA

<sup>4</sup>Department of Civil and Environmental Engineering, Duke University, Durham NC 27708 USA

<sup>5</sup>CAS IP services, CAS, Columbus OH 43202 USA

\*Corresponding author : derek.muir@sympatico.gc.ca

Summary : 15 pages, 6 Tables, 6 Figures

#### Table of Contents

| Text                                                                                                                                                                           | page |
|--------------------------------------------------------------------------------------------------------------------------------------------------------------------------------|------|
| 1. Further details on the CAS Search<br>2. Further discussion of Table 1                                                                                                       | S3   |
| Tables                                                                                                                                                                         |      |
| Table S1. List of chemical lists/databases used to screen the BIOL/occur search                                                                                                | S4   |
| Table S2. A. Classes of substances removed from the ANST/POL list<br>Table S2. B. Classes of substances in the ANST/POL list and illustrated in Figure 3                       | S7   |
| Table S3. Final ANST/POL list comprising 19,776 CASRNs including common name, InChI, SMILES, and Category where available (Separate Excel file: Muir et al Table S3 & S4.xlsx) | S9   |
| Table S4. Top 500 substances from the ANST/POL and BIOL/Occur searches (Separate Excel file: Muir et al Table S3 & S4.xlsx)                                                    | S9   |

|                                                                                                                                                                                                                                                                                                                                                                                                                                                                                                                                                                                                                                                                                                                                                                                                                                                                                                                                                                                                                                                                                                 |     |
|-------------------------------------------------------------------------------------------------------------------------------------------------------------------------------------------------------------------------------------------------------------------------------------------------------------------------------------------------------------------------------------------------------------------------------------------------------------------------------------------------------------------------------------------------------------------------------------------------------------------------------------------------------------------------------------------------------------------------------------------------------------------------------------------------------------------------------------------------------------------------------------------------------------------------------------------------------------------------------------------------------------------------------------------------------------------------------------------------|-----|
| Table S5. Comparison of reports for the top 5 pharmaceuticals in environmental samples                                                                                                                                                                                                                                                                                                                                                                                                                                                                                                                                                                                                                                                                                                                                                                                                                                                                                                                                                                                                          | S10 |
| Table S6. Information related to the inventories of United States, Peoples Republic of China, and the European Union                                                                                                                                                                                                                                                                                                                                                                                                                                                                                                                                                                                                                                                                                                                                                                                                                                                                                                                                                                            | S11 |
| Figures                                                                                                                                                                                                                                                                                                                                                                                                                                                                                                                                                                                                                                                                                                                                                                                                                                                                                                                                                                                                                                                                                         |     |
| Figure S1. (A). Total counts of CASRN per year for the 19,776 ANST/POL list and for 10,695 CASRN identified from various priority and monitoring lists. (B) Percent that the 10,695 substances on lists as well as the 3041 substances on the Meijer et al/SUSDAT CEC list represent are also shown.                                                                                                                                                                                                                                                                                                                                                                                                                                                                                                                                                                                                                                                                                                                                                                                            | S12 |
| Figure S2. Trends in total citation counts of CASRN reported each year for (A) pharmaceuticals, current use pesticides, and CECs not on other lists, (B) Legacy organochlorine (OC) pesticides, polychlorinated dibenzo-p-dioxins and –dibenzofurans (PCDD/Fs), polychlorinated biphenyls (PCBs), (C) polybrominated diphenyl ethers (PBDEs), organophosphate flame retardants and phosphate esters (OPFR-OPEs), other flame retardants (FRs), (D) Volatile organic compounds and trace gases, polycyclic aromatic hydrocarbons/compounds (PAHs/PACs), alkane/enes, (E) Major water pollutant ions, inorganic acids, disinfection byproducts, (F) Metal isotopes and major metals (scale on the right), copper (Cu), magnesium (Mg), cadmium (Cd), lead (Pb) and mercury (Hg), (G) poly/perfluoroalkyl substances (PFAS) including chlorofluorocarbons and hydrofluorocarbons (CFC-HFCs), (H) Food additives, plastics additives, fragrances, (I) Bisphenols, siloxane/silanes, aromatic amines, benzotriazoles/benzothioazoles. The CASRN also include transformation products for all groups. | S12 |
| Figure S3. Trends in total citation counts of CASRN reported each year for (A) 1809 pharmaceuticals and transformation products in the BIOL/occur list and for the 661 substances in the UBA database of pharmaceuticals and related compounds measured in environmental media and present in the ANST/POL list. (B) Percent of pharmaceuticals and the UBA database substances represented of total CASRN counts in the BIOL/occur list.                                                                                                                                                                                                                                                                                                                                                                                                                                                                                                                                                                                                                                                       | S13 |
| Figure S4. Trends in (A) total counts of CASRN and (B) percent of CASRN counts, reported each year for halogenated aromatic compounds and other non-halogenated aromatic compounds in the list of 3041 Chemicals of Emerging Concern (CECs) from the NORMAN SUSDAT list and Meijer et al. <sup>1</sup> .                                                                                                                                                                                                                                                                                                                                                                                                                                                                                                                                                                                                                                                                                                                                                                                        | S13 |
| Figure S5. Trends in (A) total counts of CASRN and (B) percent of CASRN counts, reported each year for flame retardants with (1) no chlorine, bromine or phosphorus, (2) chlorinated flame retardants (PCDEs, chlorinated polycyclic aromatics, chlorinated paraffins, mirex, Dechlorane) and (3) brominated flame retardants other than PBDEs                                                                                                                                                                                                                                                                                                                                                                                                                                                                                                                                                                                                                                                                                                                                                  | S13 |

|                                                                                                                                                                                                                |     |
|----------------------------------------------------------------------------------------------------------------------------------------------------------------------------------------------------------------|-----|
| Figure S6. Trends of (A) Total counts of CASRN for PFOS, TFA and PFOA-related compounds and (B) Percent of CASRN counts of total PFAS (Figure 4G) based on 234 PFAS identified from the USEPA PFASMaster list. | S14 |
| References                                                                                                                                                                                                     | S15 |

## 1. Further details on the CAS Search

We developed a targeted CAS Role search for substances associated in citations reported in analytical studies (ANST) and as a pollutant (POL). It can be referred to as a 'linked' CAS Role search. CAS roles are CAS indexing terms consisting of codes that describe the new or novel information reported about a substance or a class of compounds

“POL” or “Pollutant”: Defined by Chemical Abstracts (Vol. 66, 1967 to present): Assigned to a substance in studies in which the substance (viewed as a harmful substance) is encountered in the environment, including indoor and outdoor air and atmosphere, soil, water, buildings, biological systems, etc. This role is also used for substances in studies which focus on potentially harmful effects if the substance were to enter an ecosystem. In analysis for pollutants in environmental samples, the pollutant-analyte receives ANST and POL.

“ANST” or “Analytical Study”. Defined by Chemical Abstracts (Vol. 66, 1967 to present): Assigned to a substance/material in studies of the detection or identification of the constituents of the material; of the determination of the amount of a constituent in the material; of qualitative or quantitative bioassays; of involvement of the substance in an analytical procedure; for separation of the substance with analytical intent; or for identification of an unknown substance. ANST roles are not assigned to the substance when a routine analytical procedure is used as a tool to verify results of a reaction or process.

“BIOL or Biological Study/RL. Defined by Chemical Abstracts (Vol. 66 1967 to present): Assigned to a substance in studies of the role of the substance in or its effect on biological molecules and systems (including organisms, organs, cells, and subcellular systems). Such studies include metabolism, toxicity, occurrence, biological applications and composition.

We used CAS STN ([About CAS STNext®](#) | [STN International \(stn-international.com\)](#)) to search the CAS Content Collection. Unfortunately, this search approach cannot be performed/duplicated in CAS SciFinder, although the same database content is available on both platforms. However the search functionality is not equivalent. STN allows users to start at the CAS Role level for substances without searching for citation concepts. Our approach was to isolate substances with the appropriate linked roles first.

## 2. Further discussion of Table 1

“Total CASRN citation reports”: Initially 105,410 citations were identified that contained the dual substance role indexing of ANALYTICAL STUDY and POLLUTANT. The Report citation count represents the number of citations where the identified CAS RNs are present. That resulted in an initial list of 23,458 unique CAS RNs associated with those roles in those citations. “Total CASRN citation counts” represents the total number of substance hits across those citations. A single citation may have 8 substances associated with those roles, leading to a count of 8 for CASRN Count. A substance would only be counted once in each citation, but a citation may have multiple qualifying substances.

Table S1. List of chemical lists/databases used to screen the BIOL/occur search

| Name                                     | Source                                                                                                                                                                                                   | Number of Chemicals | Notes                                                              |
|------------------------------------------|----------------------------------------------------------------------------------------------------------------------------------------------------------------------------------------------------------|---------------------|--------------------------------------------------------------------|
| Pesticides                               | EPA “PESTICIDES” list from Office of Pesticide Programs Information Network, USEPA CompTox Chemicals Dashboard. Transformation products from the ANST/POL list were added                                | 4031                | Pharmaceuticals and legacy pesticides removed;                     |
| Legacy pesticides                        | Includes DDT-related, chlordanes, toxaphenes, hexachlorocyclohexanes, dieldrin/endrin, pentachlorophenol, +20 butyl tins (from Anal/PollANST/POL search)                                                 | 147                 | Transferred from Pesticides list and identified in ANST/POL search |
| Pharmaceuticals                          | Combined lists from Howard & Muir <sup>2</sup> , ZINC15PHARMA, Swiss/US list and DrugBank list from USEPA CompTox Chemicals Dashboard                                                                    | 7383                | Duplicates among the 3 lists removed. Pesticides removed           |
| IFRA Transparency List                   | International Fragrance Association<br><a href="https://ifrafragrance.org/initiatives/transparency/ifra-transparency-list">https://ifrafragrance.org/initiatives/transparency/ifra-transparency-list</a> | 3024                | Pesticides, pharmaceuticals and PAHs removed                       |
| Bisphenols                               | “NORMAN LIST” from USEPA Chemicals Dashboard + list of 20 hindered phenols                                                                                                                               | 73                  | additional CASRNs added                                            |
| PAHs and related polycyclics + n-alkanes | “PAHLIST” from USEPA CompTox Chemicals Dashboard and Supporting Information table in Achten and Andersson <sup>3</sup> + others from ANST/POL list                                                       | 1325                | Included n-alkanes, nitro and oxy-PAHs, and heterocyclics          |
| Flame retardants                         | Included chlorinated paraffins from “C10CHLOROPARAFF” and “FLAMERETARD” from USEPA CompTox Chemicals Dashboard. Also included PBBs, PCDEs, bromophenols, bromo/chloro-benzenes from ANST/POL search      | 879                 | PBDEs removed.                                                     |
| PBDEs                                    | “PBDES” List from USEPA CompTox Chemicals Dashboard + other PBDEs in the ANST/POL search.                                                                                                                | 246                 | Including PBDE metabolites, bromo-chloro BDEs and                  |

|                                             |                                                                                                                      |       |                                                                      |
|---------------------------------------------|----------------------------------------------------------------------------------------------------------------------|-------|----------------------------------------------------------------------|
|                                             |                                                                                                                      |       | alternate CASRNs                                                     |
| PCBs                                        | “PCBCHEMICALS” List from USEPA CompTox Chemicals Dashboard + PCB transformation products from ANST/POL list          | 429   | Including 211 PCB metabolites and alternate CASRNs                   |
| PFAS                                        | “PFASMASTER” List of PFAS Substances from USEPA CompTox Chemicals Dashboard                                          | 5076  | Used without editing                                                 |
| Elements and major ions                     | From ANST/POL search. Identified by common name and InChI code                                                       | 728   | Includes metal isotopes and radionuclides                            |
| atmospheric trace gases                     | From ANST/POL search. Identified by common name and InChI code (267). Includes CFC/HFCs (165)                        | 432   |                                                                      |
| Disinfection byproducts                     | Disinfection By-products (Richardson et al) (USEPA CompTox Chemicals Dashboard)                                      | 533   | Pesticides, fragrances, pharmaceuticals and flame retardants removed |
| Benzotriazole/thiazoles and aromatic amines | AROMATICAMINES (22), TIRECRUMB (290) USEPA CompTox Chemicals Dashboard                                               | 312   | Removed duplicates with plastic additives                            |
| Food additives and natural constituents     | FOODB from Wishart lab – <a href="https://www.wishartlab.com/web_servers">https://www.wishartlab.com/web_servers</a> | 15948 | pesticides, pharmaceuticals and fragrances removed                   |
| Plastics additives                          | PlasticsAdd list published by Wiesinger et al. <sup>4</sup>                                                          | 8296  | Pesticides, PAH, alkane/enes, bisphenols, hindered phenols,          |

|                                      |                                                                                                                                                                                                                                                                                          |        |                                                              |
|--------------------------------------|------------------------------------------------------------------------------------------------------------------------------------------------------------------------------------------------------------------------------------------------------------------------------------------|--------|--------------------------------------------------------------|
|                                      |                                                                                                                                                                                                                                                                                          |        | pharmaceuticals and fragrances removed                       |
| Chemicals of Emerging Concern (CECs) | NORMAN Suspect List Exchange ( <a href="http://www.norman-network.com/?q=node/236">http://www.norman-network.com/?q=node/236</a> )<br>Accessed August 2020 via USEPA CompTox Chemicals Dashboard                                                                                         | 62,259 | Wide range of chemistries plus predicted Phase 1 metabolites |
| Volatile organic compounds (VOCs)    | VocBinBase volatile compounds database (USEPA CompTox Chemicals Dashboard); Supplementary Table in Wang et al. <sup>5</sup> ; List from Condorchem Inc <a href="https://condorchem.com/en/volatile-organic-compound-list/">https://condorchem.com/en/volatile-organic-compound-list/</a> | 268    | Duplicates removed                                           |
| Transformation products.             | NORMAN: Parent-Transformation Product Pairs from EAWAG (USEPA CompTox Chemicals Dashboard) + 30 additional substances from ANST/POL list                                                                                                                                                 | 262    | Some duplication with pesticide list                         |
| Mycotoxins                           | MYCOTOX2 LIST: Mycotoxins (USEPA CompTox Chemicals Dashboard)                                                                                                                                                                                                                            | 328    | Screened ANST/POL list and removed                           |

Table S2. A. Classes of substances removed from the ANST/POL list

| Class                     | Original list | After editing |
|---------------------------|---------------|---------------|
| Acid                      | 6             | 0             |
| Alloy                     | 18            | 0             |
| Complex structure         | 116           | 0             |
| Mass labelled             | 117           | 0             |
| Mineral                   | 138           | 0             |
| Inorganic salts           | 902           | 0             |
| Polymer                   | 157           | 0             |
| Elements + Metal Isotopes | 887           | 836           |
| Food related              | 953           | 103           |
| Natural product           | 1082          | 0             |
| No structure              | 78            | 0             |
| Unknown structure         | 13            | 0             |
| Enzymes                   | 15            | 0             |
| Mixture                   | 69            | 0             |
| All others                |               | 18837         |
| With Inchi codes          | 23395         | 19740         |
| With SMILES               | 17600         | 15175         |

Table S2. B. Classes of substances in the ANST/POL list and illustrated in Figure 3

| Class                                              | Number of CASRNs | %     |
|----------------------------------------------------|------------------|-------|
| Pharmaceuticals                                    | 1809             | 9.15% |
| Br, Cl and P related flame retardants <sup>1</sup> | 1417             | 7.17% |
| PCB related                                        | 453              | 2.29% |
| PBDE related                                       | 170              | 0.86% |
| PFAS related                                       | 295              | 1.49% |
| PCDD/Fs                                            | 322              | 1.63% |



|                                                            |      |       |
|------------------------------------------------------------|------|-------|
| Siloxane/silanes                                           | 74   | 0.37% |
| Plastics additives                                         | 784  | 3.96% |
| Bisphenols+ alkyl phenols                                  | 46   | 0.23% |
| Benzotriazole/thiazoles and aromatic amines                | 68   | 0.34% |
| In use pesticides                                          | 1821 | 9.21% |
| Legacy pesticides                                          | 125  | 0.63% |
| Metals/isotopes                                            | 836  | 4.23% |
| Major ions+inorganic acids                                 | 26   | 0.13% |
| Gases/VOC/CFC/HFCs                                         | 183  | 0.93% |
| Alkane/enes                                                | 575  | 2.91% |
| PAH/PACs                                                   | 1215 | 6.14% |
| Fragrances                                                 | 566  | 2.86% |
| Disinfection byproducts                                    | 146  | 0.74% |
| Food related                                               | 103  | 0.52% |
| Organometallics                                            | 77   | 0.39% |
| CECs from Meijer et al. (2020)/ NORMAN network SUSDAT list | 3041 | 15.4% |
| Not characterized                                          | 5624 | 28.4% |

<sup>1</sup>Includes BFRs, chlorinated paraffins, polychlorinated polyaromatics,

<sup>2</sup>Includes products identified using CompTox Chemicals Dashboard lists. Most transformation products were identified manually and included with each substance group

Table S3. Final ANST/POL list comprising 19,776 CASRNs including common name, InChI, SMILES, and Category where available (Separate Excel file: Muir et al Table S3 & S4.xlsx)

Table S4. Top 500 substances from the ANST/POL and BIOL/Occur searches (separate Excel file: Muir et al Table S3 & S4.xlsx)

Table S5. Comparison of reports for the top 5 pharmaceuticals in environmental samples

| Top Five          |                  | CASRN      | UBA reports <sup>1</sup> | ANST/POL list BIOL/Occur search <sup>2</sup> | SciFinder Occurrence role <sup>3</sup> | Scifinder Biological role <sup>4</sup> |
|-------------------|------------------|------------|--------------------------|----------------------------------------------|----------------------------------------|----------------------------------------|
| UBA database      | ibuprofen        | 15687-27-1 | 6,848                    | 940                                          | 2204                                   |                                        |
|                   | Diclofenac       | 15307-86-5 | 6,491                    | 5958                                         | 2874                                   |                                        |
|                   | Carbamazepine    | 298-46-4   | 6,323                    | 8241                                         | 2799                                   |                                        |
|                   | Sulfamethoxazole | 723-46-6   | 5,397                    | 15228                                        | 3127                                   |                                        |
|                   | Trimethoprim     | 738-70-5   | 3,976                    | 16600                                        | 1793                                   |                                        |
| BIOL/Occur search | Cisplatin        | 15663-27-1 | NA                       | 38929                                        | 62                                     |                                        |
|                   | Dexamethasone    | 50-02-2    | 90                       | 34991                                        | 205                                    |                                        |
|                   | Ciprofloxacin    | 85721-33-1 | 2064                     | 33724                                        | 2292                                   |                                        |
|                   | Gentamicin       | 1403-66-3  | 6                        | 32825                                        | 440                                    | 176                                    |
|                   | Doxorubicin      | 23214-92-8 | 17                       | 31301                                        | 44                                     | 31                                     |

<sup>1</sup>Number of reports or studies in the UBA database for each chemical

<sup>2</sup>Number of reports or studies from the CASPlus database based on reduced list of 19800 from the ANST/POL and then search using roles of BIOL and Occurrence

<sup>3</sup> SciFinder search for each CASRN via “substance identifier” then selecting the Role “Occurrence”, refining for period 1960-2018, and then categorizing “environmental chemistry”, “pollutant”

<sup>4</sup> SciFinder search for each CASRN via “substance identifier” then selecting the Role “Biological”, refining for period 1960-2018, and then categorizing by “environmental chemistry”, “pollutant”

Table S6. Information related to the inventories of United States, Peoples Republic of China, and the European Union

| Country or Region | Inventory                                                  | Web address                                                                                                                                                                       | Number of CASRN <sup>1</sup> |
|-------------------|------------------------------------------------------------|-----------------------------------------------------------------------------------------------------------------------------------------------------------------------------------|------------------------------|
| USA               | Toxic Substances Control Act (TSCA)                        | <a href="https://www.epa.gov/tsca-inventory/how-access-tsca-inventory">https://www.epa.gov/tsca-inventory/how-access-tsca-inventory</a> (accessed June 2018)                      | 67950                        |
| China             | Inventory of Existing Chemical Substances of China (IECSC) | <a href="http://www.mee.gov.cn/gkml/hbb/bgg/201301/t20130131_245810.htm">http://www.mee.gov.cn/gkml/hbb/bgg/201301/t20130131_245810.htm</a> (accessed March 2017)                 | 37107                        |
| European Union    | REACH inventory – registered substances                    | <a href="https://echa.europa.eu/information-on-chemicals/registered-substances">https://echa.europa.eu/information-on-chemicals/registered-substances</a> (accessed January 2019) | 16760                        |

<sup>1</sup>Number of substances in downloadable files with CASRN<sup>s</sup>

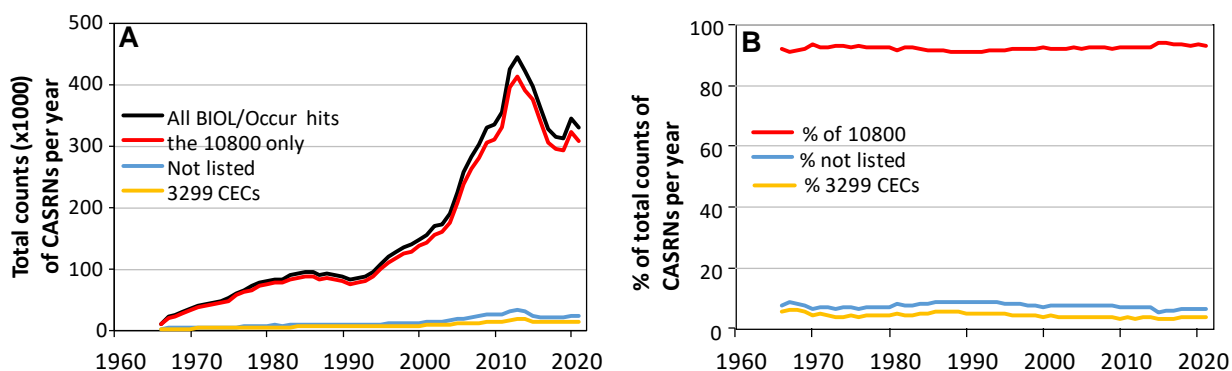

Figure S1. (A). Total counts of CASRN per year for the BIOL/occur search using the ANST/POL list and for 10,800 CASRN identified from various priority and monitoring lists. (B) Percent that the 10,800 substances on lists as well as the 3041 substances on the Meijer et al/SUSDAT chemicals of emerging concern (CEC) list represent are also shown.

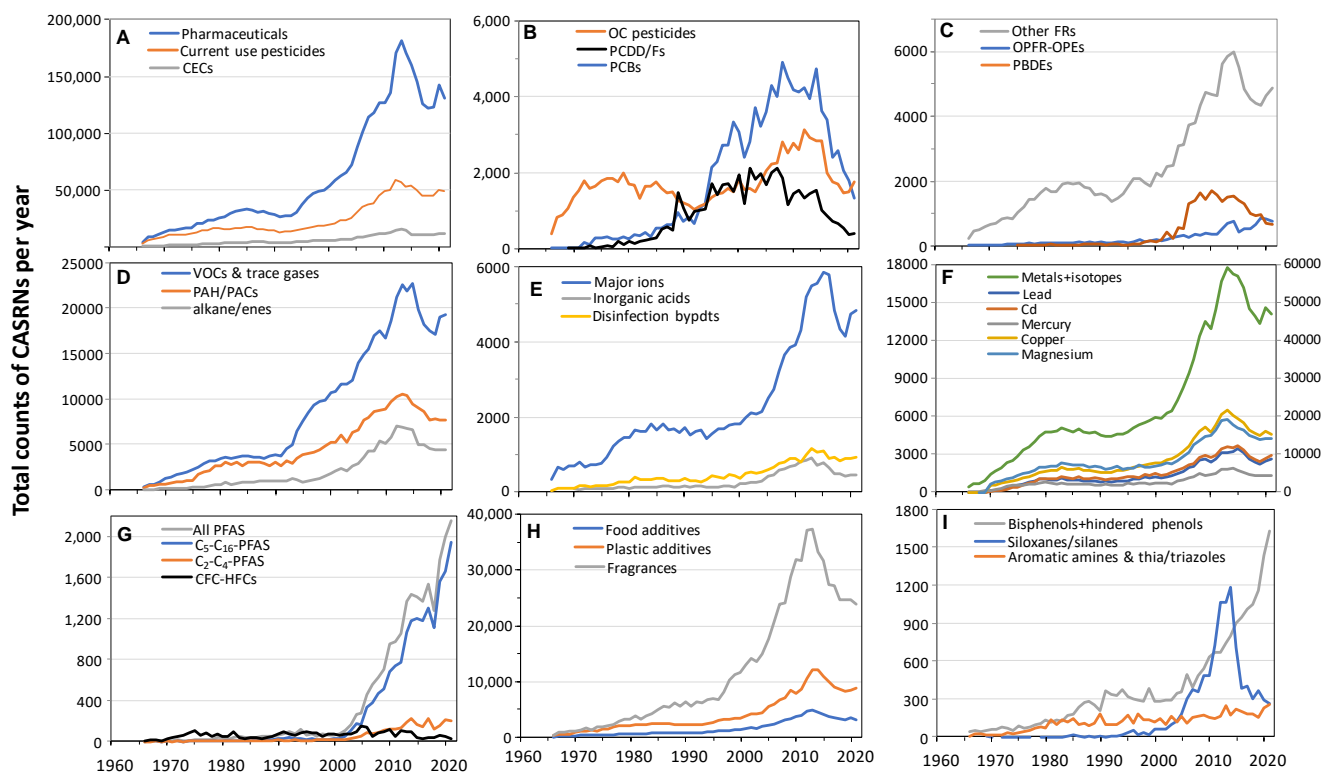

Figure S2. Trends in total citation counts of CASRN reported each year for (A) pharmaceuticals, current use pesticides, and CECs not on other lists, (B) Legacy organochlorine (OC) pesticides, polychlorinated dibenzo-p-dioxins and -dibenzofurans (PCDD/Fs), polychlorinated biphenyls (PCBs), (C) polybrominated diphenyl ethers (PBDEs), organophosphate flame retardants and phosphate esters (OPFR-OPEs), other flame retardants (FRs), (D) Volatile organic compounds and trace gases, polycyclic aromatic hydrocarbons/compounds (PAHs/PACs), alkane/enes, (E) Major water pollutant ions, inorganic acids, disinfection byproducts, (F) Metal isotopes and major metals (scale on the right), copper (Cu), magnesium (Mg), cadmium (Cd), lead (Pb) and mercury (Hg), (G) poly/perfluoroalkyl substances (PFAS) including chlorofluorocarbons and hydrofluorocarbons (CFC-HFCs), (H) Food additives, plastics additives, fragrances, (I) Bisphenols, siloxane/silanes, aromatic amines, benzotriazoles/benzothioazoles. The CASRN also include transformation products for all groups.

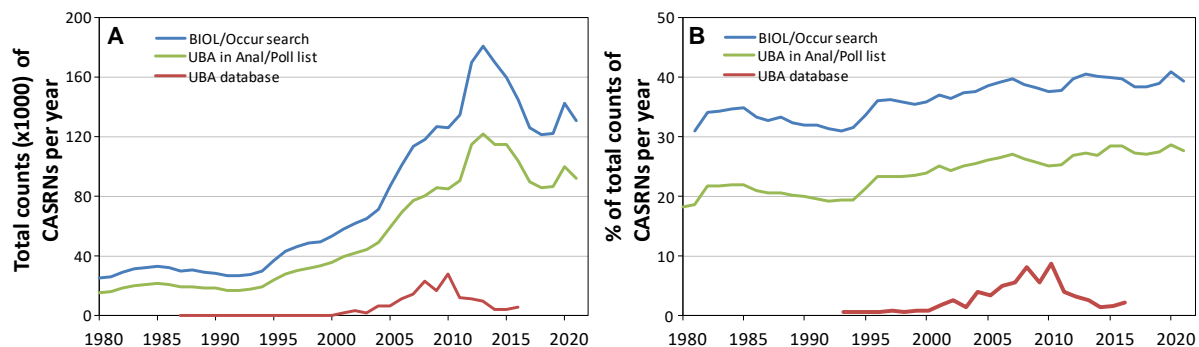

Figure S3. Trends in total citation counts of CASRNs reported each year for (A) 1809 pharmaceuticals and transformation products in the BIOL/occur list and for the 661 substances in the UBA database of pharmaceuticals and related compounds measured in environmental media and present in the ANST/POL list. (B) Percent of pharmaceuticals and the UBA database substances represented of total CASRN counts in the BIOL/occur list.

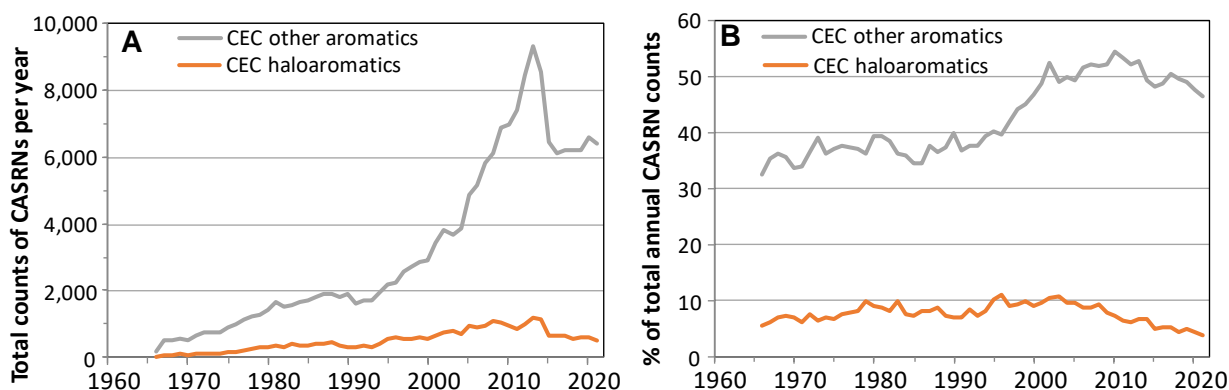

Figure S4. Trends in (A) total citation counts of CASRNs and (B) percent of CASRN counts, reported each year for halogenated aromatic compounds and other non-halogenated aromatic compounds in the list of 3041 Chemicals of Emerging Concern (CECs) from the NORMAN SUSDAT list and Meijer et al. <sup>1</sup>.

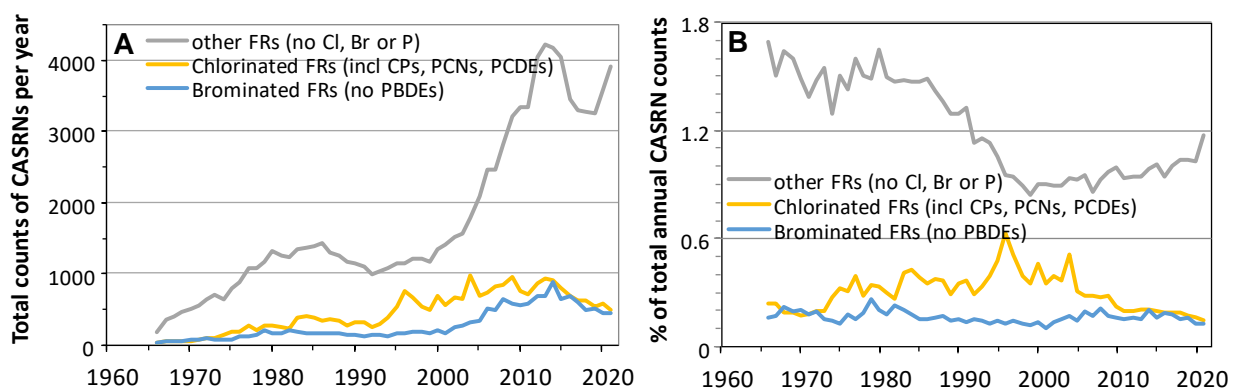

Figure S5. Trends in (A) total citation counts of CASRNs and (B) percent of CASRN counts, reported each year for flame retardants with (1) no chlorine, bromine or phosphorus, (2) chlorinated flame retardants (PCDEs, chlorinated polycyclic aromatics, chlorinated paraffins, mirex, Dechlorane) and (3) brominated flame retardants other than PBDEs

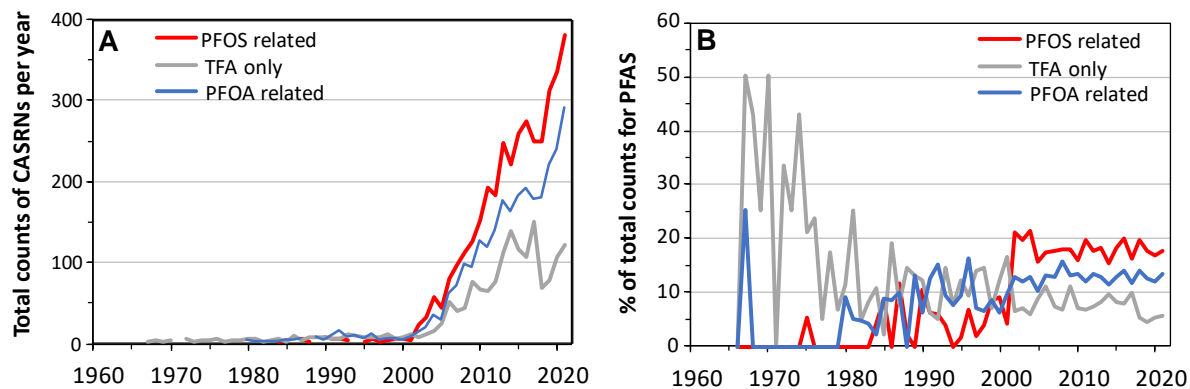

Figure S6. Trends of (A) Total citation counts of CASRN's for PFOS, TFA and PFOA-related compounds and (B) Percent of CASRN counts of total PFAS (Figure 4G) based on 234 PFAS identified from the USEPA PFASMaster list.

## References

- (1) Meijer, J.; Lamoree, M.; Hamers, T.; Antingac, J.-P.; Hutinet, S.; Debrauwer, L.; Covaci, A.; Huber, C.; Krauss, M.; Walker, D. I.; Schymanski, E.; Vermeulen, R.; Vlaanderen, J. *HBM4EU CECscreen: Screening List for Chemicals of Emerging Concern Plus Metadata and Predicted Phase 1 Metabolites*. S71. CECScreen. <https://zenodo.org/record/3956587#.X0kY3aRE1aQ>; 2020.
- (2) Howard, P. H.; Muir, D. C. G. Identifying New Persistent and Bioaccumulative Organics Among Chemicals in Commerce II: Pharmaceuticals. *Environ Sci Technol*. **2011**, *45*, 6938-6946.
- (3) Achten, C.; Andersson, J. T. Overview of Polycyclic Aromatic Compounds (PAC). *Polycyclic Aromatic Compounds* **2015**, *35* (2-4), 177-186. DOI: 10.1080/10406638.2014.994071.
- (4) Wiesinger, H.; Wang, Z.; Hellweg, S. Deep Dive into Plastic Monomers, Additives, and Processing Aids. *Environmental Science & Technology* **2021**, *55* (13), 9339-9351. DOI: 10.1021/acs.est.1c00976.
- (5) Wang, Y.-C.; Lin, C.; Lin, Y.-K.; Wang, Y.-F.; Weng, W.-H.; Kuo, Y.-M. Characteristics and determinants of ambient volatile organic compounds in primary schools. *Environmental Science: Processes & Impacts* **2016**, *18* (11), 1458-1468, 10.1039/C6EM00491A. DOI: 10.1039/C6EM00491A.
